# Supplementary material
Source: Research Square preprint supplement (doi:10.21203/rs.3.rs-10355054/v1)
Supplement: Supplementary file 1 [file 2731665384d2193dcfc03aa7.docx]

**Appendixes**

**Table S1** Scenario generation, assessment, and profiling using AI (DeepSeek V4; 2026-04-21) with human-in-the-loop validation

| Task | Prompt |
| --- | --- |
| Scenario generation | *Prompt for generation of 120 logical relationship between five key components*  List all possible combinations of logical relationships among five thresholds (connected by "<"): CPL, ECC, HTCC, MVP, PTL. |
| Scenario assessment | *Prompt for creating assessment table for 120 scenarios based on Judgement criteria (Table S2):*  Create a table with "Order" (Column 1) and "Scenario" (Column 2), keeping the same content as the prior answer. Columns 3–11 correspond to the criteria: CPL < MVP, ECC < MVP, ECC < CPL, PTL < CPL, ECC < PTL, PTL < MVP, HTCC < CPL, HTCC < MVP, HTCC < PTL. Score 1 for a met criterion and 0 for an unmet one for each scenario. |
| Scenario profiling | *Prompt for scenario profiling with keywords systematically assigned based one criteria listed in Table S2:*  Add another column called “Description”, and add four keywords if respective criteria are met; keywords are organized in the following format: "keyword 1; keyword 2; keyword 3; keyword 4":  Keyword 1, if CPL<MVP：“threatened”; else "non-threatened".  Keyword 2, if HTCC is the biggest or if HTCC is the second biggest but small than ECC: "non-conflict"; else, "conflict-prone".  Keyword 3, if ECC < MVP: "lack of habitat"; else if ECC < CPL, but MVP < ECC: "overshot"; else "NA".  Keyword 4, if PTL < MVP: "government support for unviability"; else if PTL > MVP and PTL < CPL: "government support for reduction"; else if PTL > MVP and PTL > CPL: "government support for growth". |

**Table S2** Judgement criteria for scenario assessment

| **Domain** | **Criterion** | **Conservation issue** |
| --- | --- | --- |
| Species &  habitat reality | CPL < MVP | Threatened species |
| ECC < MVP | Lack of habitat |
| ECC < CPL | Population overshot |
|  |  |  |
| Management objectives & commitment | PTL < CPL | Managerial need for population control |
| ECC < PTL | Unrealistic goals |
| PTL < MVP | Lack of commitment to species' viability |
|  |  |  |
| Public attitudes & tolerance | HTCC < CPL | Intolerance to current level |
| HTCC < MVP | Intolerance to viable level |
| HTCC < PTL | Opposition to management goal |

**Table S3** Scenario profiling using context-specific keywords

| **Keywords** | **Criteria** | **Term** | **Rationality** |
| --- | --- | --- | --- |
| KW1 | if CPL < MVP | "threatened" | Describe species threat status. |
| else | "non-threatened" |
| KW2 | if HTCC is the biggest or if HTCC is the second biggest but small than ECC | "non-conflict" | Describe conflict tendency. Conflict-prone includes social rejection toward (1) current population size (HTCC < CPL); (2) viable population size (HTCC < MVP); and government population target (HTCC < PTL). |
|
| else | "conflict-prone" |
|
|
|
| KW3 | if ECC < MVP | "lack of habitat" | Describe habitat affordability. |
| else if ECC < CPL, but MVP < ECC | "overshot" |
| else | "NA" |
| KW4 | if PTL < MVP | "government support for unviability" | Describe government preference. |
| else if PTL > MVP and PTL < CPL | "government support for reduction" |
| else if PTL > MVP and PTL > CPL | "government support for growth" |

**Table S4** Unlikely conservation scenarios for threatened conflict-prone species based on irrational contradictions

| **Scenario type** | **Scenario** | **Rationale** |
| --- | --- | --- |
| NA; governmental support for unviable | PTL < CPL < HTCC < MVP < ECC | HTCC is above CPL, government is unlikely to support reduction |
| HTCC < PTL < CPL < MVP < ECC | As government supports for reduction and unviability, it's unlikely setting PTL causing further public opposition |
|  |  |  |
| NA; governmental support for growth | CPL < MVP < HTCC < PTL < ECC | HTCC is already above MVP, govenment is unlikely to set PTL causing further public opposition |
| CPL < HTCC < MVP < ECC < PTL | HTCC is low to support viable level, it's unlikely to set PTL beyond ECC |
| CPL < MVP < ECC < HTCC < PTL | Government is unlikely to set PTL beyond ECC while setting PTL to cause public opposition |
| CPL < MVP < HTCC < ECC < PTL | Government is unlikely to set PTL beyond ECC while setting PTL to cause public opposition |
| HTCC < CPL < MVP < ECC < PTL | Government is unlikely to set PTL beyond ECC while setting PTL to cause public opposition |
|  |  |  |
| lack of habitat; governmental support for unviable | CPL < ECC < HTCC < PTL < MVP | Government is unlikely to support for unviability while setting PTL to cause public opposition |
| CPL < HTCC < ECC < PTL < MVP | Government is unlikely to support for unviability while setting PTL to cause public opposition |
| CPL < HTCC < PTL < ECC < MVP | Government is unlikely to support for unviability while setting PTL to cause public opposition |
| ECC < HTCC < CPL < PTL < MVP | Government is unlikely to support for unviability while setting PTL to cause public opposition |
| ECC < HTCC < PTL < CPL < MVP | As government supports for reduction and unviability, it's unlikely setting PTL causing further public opposition |
| HTCC < CPL < ECC < PTL < MVP | Government is unlikely to support for unviability while setting PTL to cause public opposition |
| HTCC < CPL < PTL < ECC < MVP | Government is unlikely to support for unviability while setting PTL to cause public opposition |
| HTCC < ECC < CPL < PTL < MVP | Government is unlikely to support for unviability while setting PTL to cause public opposition |
| HTCC < ECC < PTL < CPL < MVP | Government is unlikely to support for unviability while setting PTL to cause public opposition |
| HTCC < PTL < CPL < ECC < MVP | Government is unlikely to support for unviability while setting PTL to cause public opposition |
| HTCC < PTL < ECC < CPL < MVP | Government is unlikely to support for unviability while setting PTL to cause public opposition |
| ECC < PTL < CPL < HTCC < MVP | As government supports for reduction and unviability, it's unlikely setting PTL above current ECC |
| ECC < PTL < HTCC < CPL < MVP | As government supports for reduction and unviability, it's unlikely setting PTL above current ECC |
|  |  |  |
| lack of habitat; governmental support for growth | CPL < ECC < MVP < HTCC < PTL | As HTCC is already above MVP, government is unlikely to set PTL causing further public opposition |
| ECC < CPL < MVP < HTCC < PTL | As HTCC is already above MVP, government is unlikely to set PTL causing further public opposition |

**Table S5** Applicable conservation scenarios for threatened conflict-prone species

| **Scenario type** | **Scenario** | **Sensitivity Score** | **Conservation priority** |
| --- | --- | --- | --- |
| NA; governmental support for unviable | PTL < HTCC < CPL < MVP < ECC | 5 | Increase HTCC to allow higher PTL to support population growth towards viable population level |
| CPL < PTL < HTCC < MVP < ECC | 3 | Increase HTCC to allow higher PTL to support viable population level |
| CPL < HTCC < PTL < MVP < ECC | 4 | Increase HTCC to allow higher PTL to support viable population level |
| HTCC < CPL < PTL < MVP < ECC | 5 | Increase HTCC to allow higher PTL to support population growth towards viable population level |
| NA; governmental support for growth | CPL < HTCC < MVP < PTL < ECC | 3 | Increase HTCC to support viable population level |
| HTCC < CPL < MVP < PTL < ECC | 4 | Increase HTCC to support current population and further growth towards livable population level |
| lack of habitat; governmental support for unviable | CPL < ECC < PTL < HTCC < MVP | 5 | Increase habitat |
| CPL < PTL < ECC < HTCC < MVP | 4 | Increase habitat |
| CPL < PTL < HTCC < ECC < MVP | 4 | Increase habitat |
| ECC < CPL < HTCC < PTL < MVP | 7 | Increase habitat |
| ECC < CPL < PTL < HTCC < MVP | 6 | Increase habitat |
| PTL < HTCC < CPL < ECC < MVP | 6 | Increase habitat |
| PTL < ECC < CPL < HTCC < MVP | 6 | Increase habitat |
| PTL < ECC < HTCC < CPL < MVP | 7 | Increase habitat |
| PTL < CPL < ECC < HTCC < MVP | 5 | Increase habitat |
| PTL < CPL < HTCC < ECC < MVP | 5 | Increase habitat |
| PTL < HTCC < ECC < CPL < MVP | 7 | Increase habitat |
| lack of habitat; governmental support for growth | CPL < ECC < HTCC < MVP < PTL | 5 | Increase habitat |
| CPL < HTCC < ECC < MVP < PTL | 5 | Increase habitat |
| ECC < CPL < HTCC < MVP < PTL | 6 | Increase habitat |
| ECC < HTCC < CPL < MVP < PTL | 7 | Increase habitat |
| HTCC < CPL < ECC < MVP < PTL | 6 | Increase habitat |
| HTCC < ECC < CPL < MVP < PTL | 7 | Increase habitat |
